# Supplementary material
Source: PubMed Central journal article supplement (PMC5100760)
Supplement: supp_pp.16.01096_PP2016-01096DR1_Supplemental_Materialfigs.pdf [file supp_pp.16.01096_PP2016-01096DR1_Supplemental_Materialfigs.pdf]

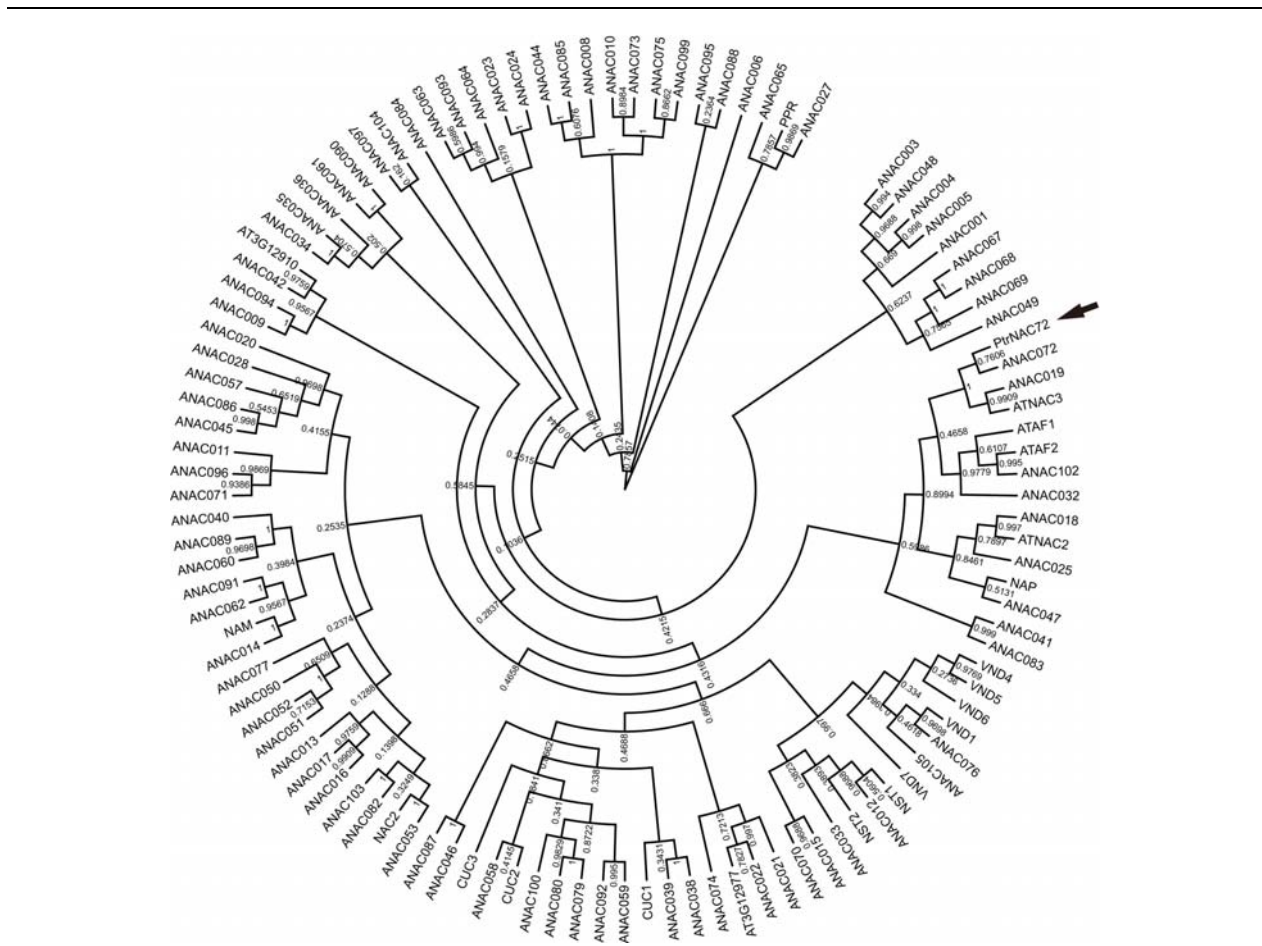

1  
 2 Figure S1. Phylogenetic analysis of PtrNAC72. Phylogenetic tree constructed with the amino  
 3 acid sequences of PtrNAC72 (indicated by arrow) and *A. thaliana* NAC proteins. The  
 4 evolutionary distances were computed in units of the number of amino acid substitutions per site,  
 5 as shown by the number in the tree.

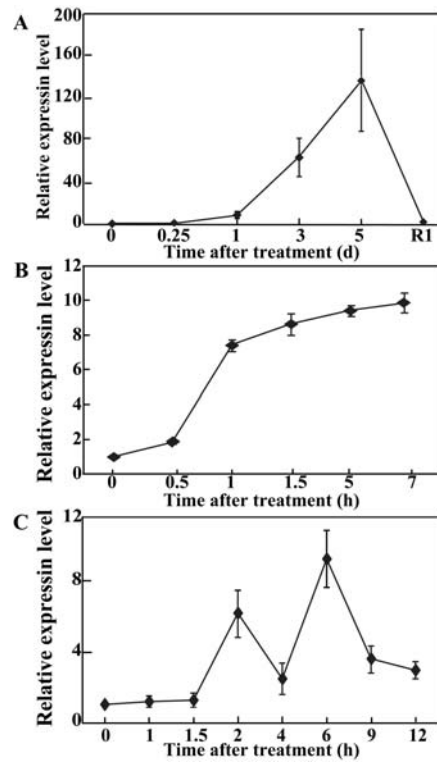

6

7 Figure S2: Expression of *PtrNAC72* in response to abiotic stress and abscisic acid (ABA)

8 treatment. (A) *PtrNAC72* transcript levels in response to cold treatment for 5 d, followed by

9 recovery at ambient temperature for 1 d (R1). (B) *PtrNAC72* transcript levels in response to

10 dehydration for up to 7 h. (C) *PtrNAC72* transcript levels in response to ABA treatment. Total

11 RNA was isolated from leaves of one-month-old *in vitro* grown seedlings sampled at the

12 designated time points. *ACTIN* was used as an internal control for expression normalization.

13 Error bars indicate SD (n = 4).

14
